# Supplementary material for: Sleep quality and risk of coronary heart disease - a prospective cohort study from the English longitudinal study of ageing
Source: Aging (Albany NY). 2020 Nov 16;12(24):25005–19. doi: 10.18632/aging.103866 (PMC7803507; doi:10.18632/aging.103866)
Supplement: Supplementary Tables [file aging-12-103866-s002.pdf]

## SUPPLEMENTARY TABLES

**Supplementary Table 1. Association between baseline sleep quality with risk of angina.**

|                               | Categorical            |                                |                        | Continuous             |
|-------------------------------|------------------------|--------------------------------|------------------------|------------------------|
|                               | Good Quality<br>N=3703 | Intermediate<br>Quality N=3863 | Poor quality<br>N=2004 | Per one score increase |
| No. of Cases<br>/Person-Years | 66/22596               | 108/24090                      | 70/11824               | 244/58510              |
| Model 1                       | 1 (reference)          | 1.588 (1.168, 2.159)           | 2.428 (1.724, 3.420)   | 1.611 (1.378, 1.884)   |
| P value                       |                        | 0.003                          | <0.001                 | <0.001                 |
| Model 2                       |                        | 1.456 (1.026, 2.066)           | 2.162 (1.454, 3.216)   | 1.558 (1.297, 1.871)   |
| P value                       | 1 (reference)          | 0.035                          | <0.001                 | <0.001                 |
| Model 3                       |                        | 1.585 (1.025, 2.452)           | 2.677 (1.497, 4.786)   | 1.745 (1.319, 2.310)   |
| P value                       | 1 (reference)          | 0.039                          | <0.001                 | <0.001                 |

Model 1: adjusted for age, sex

Model 2: model 1+education, social economic classification, marital status, income

Model 3: model 2+ current smoking, alcohol consumption, BMI, physical activity, diabetes, high blood cholesterol, hypertension, depression, sleep duration

**Supplementary Table 2. Association between baseline sleep quality with risk of myocardial infarction.**

|                               | Categorical            |                                |                        | Continuous                |
|-------------------------------|------------------------|--------------------------------|------------------------|---------------------------|
|                               | Good Quality<br>N=3703 | Intermediate<br>Quality N=3863 | Poor quality<br>N=2004 | Per one score<br>increase |
| No. of Cases<br>/Person-Years | 76/22596               | 83/24090                       | 54/11824               | 213/58510                 |
| Model 1                       | 1 (reference)          | 1.089 (0.797, 1.487)           | 1.742 (1.221, 2.485)   | 1.313 (1.107, 1.558)      |
| P value                       |                        | 0.594                          | 0.002                  | 0.002                     |
| Model 2                       |                        | 1.173 (0.819, 1.681)           | 1.726 (1.139, 2.615)   | 1.318 (1.083, 1.605)      |
| P value                       | 1 (reference)          | 0.384                          | 0.010                  | 0.006                     |
| Model 3                       |                        | 1.279 (0.818, 2.000)           | 1.493 (0.764, 2.919)   | 1.325 (0.976, 1.797)      |
| P value                       | 1 (reference)          | 0.280                          | 0.241                  | 0.071                     |

Model 1: adjusted for age, sex

Model 2: model 1+education, social economic classification, marital status, income

Model 3: model 2+ current smoking, alcohol consumption, BMI, physical activity, diabetes, high blood cholesterol, hypertension, depression, sleep duration

**Supplementary Table 3. Association between sleep quality change and risk of incident CHD.**

|                                  |                       | Model 1              | Model 2              | Model 3              |
|----------------------------------|-----------------------|----------------------|----------------------|----------------------|
|                                  | Cases<br>/Person-Year | HR (95% CI)          |                      |                      |
| Maintaining good quality         | 73/13244              | 1 (reference)        | 1 (reference)        | 1 (reference)        |
| Quality improved                 | 63/10262              | 1.202 (0.857, 1.685) | 1.008 (0.682, 1.490) | 0.992 (0.606, 1.624) |
| Maintaining intermediate quality | 122/16942             | 1.298 (0.969, 1.737) | 1.176 (0.848, 1.631) | 1.288 (0.856, 1.939) |
| Quality worsened                 | 83/11588              | 1.340 (0.978, 1.836) | 1.189 (0.833, 1.698) | 1.051 (0.675, 1.635) |
| Maintaining Poor quality         | 70/6474               | 2.430 (1.742, 3.390) | 2.235 (1.530, 3.265) | 1.876 (1.055, 3.334) |

Model 1: adjusted for age, sex

Model 2: model 1+education, social economic classification, marital status, income

Model 3: model 2+ current smoking, alcohol consumption, BMI, physical activity, diabetes, high blood cholesterol, hypertension, depression, sleep duration

**Supplementary Table 4. Contribution of each individual sleep problem at baseline to CHD risk.**

|                                             | Cases/Person-Year | HR (95% CI)          | P value |
|---------------------------------------------|-------------------|----------------------|---------|
| <b>Difficulty falling asleep</b>            |                   |                      |         |
| Not during the last month                   | 237/35330         | 1 (reference)        |         |
| Less than once a week                       | 43/7906           | 1.020 (0.642, 1.620) | 0.935   |
| Once or twice a week                        | 47/6606           | 1.407 (0.886, 2.233) | 0.148   |
| Three or more times a week                  | 84/8668           | 1.843 (1.166, 2.913) | 0.009   |
| <b>Wake up several times at night</b>       |                   |                      |         |
| Not during the last month                   | 76/14020          | 1 (reference)        |         |
| Less than once a week                       | 39/6702           | 1.363 (0.789, 2.353) | 0.267   |
| Once or twice a week                        | 63/10444          | 1.180 (0.718, 1.941) | 0.514   |
| Three or more times a week                  | 233/27344         | 1.710 (1.153, 2.538) | 0.008   |
| <b>Wake up feeling tired &amp; worn out</b> |                   |                      |         |
| Not during the last month                   | 172/28810         | 1 (reference)        |         |
| Less than once a week                       | 62/9724           | 1.171 (0.769, 1.784) | 0.462   |
| Once or twice a week                        | 68/8962           | 1.570 (1.022, 2.412) | 0.039   |
| Three or more times a week                  | 109/11014         | 1.921 (1.280, 2.881) | 0.002   |

Adjusted for age, sex, education, social economic classification, marital status, income, current smoking, alcohol consumption, BMI, physical activity, diabetes, high blood cholesterol, hypertension, depression, sleep duration

**Supplementary Table 5. Association between baseline sleep quality with outcome in imputed dataset.**

|                | Categorical   |                      |                      | Continuous             |
|----------------|---------------|----------------------|----------------------|------------------------|
|                | Good Quality  | Intermediate Quality | Poor quality         | Per one score increase |
| <b>CHD</b>     | 1 (reference) | 1.385 (1.028, 1.864) | 1.945 (1.285, 2.943) | 1.467 (1.207, 1.783)   |
| <b>P value</b> |               | < 0.001              | < 0.001              | < 0.001                |
| <b>Angina</b>  | 1 (reference) | 1.529 (1.030, 2.270) | 2.387 (1.399, 4.071) | 1.675 (1.300, 2.159)   |
| <b>P value</b> |               | 0.035                | < 0.001              | < 0.001                |
| <b>MI</b>      | 1 (reference) | 1.268 (0.840, 1.916) | 1.737 (0.970, 3.109) | 1.310 (0.996, 1.723)   |
| <b>P value</b> |               | 0.259                | 0.063                | 0.054                  |

CHD: coronary heart disease; MI: myocardial infarction

Adjusted for age, sex, education, social economic classification, marital status, income, current smoking, alcohol consumption, BMI, physical activity, diabetes, high blood cholesterol, hypertension, depression, sleep duration

**Supplementary Table 6. Missing data proportion of each covariate.**

| Covariate               | N (%)       |
|-------------------------|-------------|
| Age                     | 0 (0)       |
| sex                     | 0 (0)       |
| Education level         | 298 (3.1)   |
| NS-SEC                  | 356 (3.7)   |
| Marital status          | 1 (0.01)    |
| Total wealth group      | 1273 (13.3) |
| Drink alcohol frequency | 207 (2.2)   |
| Current smoking         | 66 (0.8)    |
| Physical activity       | 13 (0.1)    |
| BMI                     | 1448 (15.1) |
| Depression              | 83 (1.2)    |
| Diabetes                | 4 (0.04)    |
| Hypertension            | 4 (0.04)    |
| High cholesterol        | 14 (0.2)    |
| Sleep duration          | 24 (0.3)    |

NS-SEC: national statistics social-economic classification; BMI: body mass index
